# Supplementary material for: Multi-model mean nitrogen and sulfur deposition from the Atmospheric Chemistry and Climate Model Intercomparison Project (ACCMIP): evaluation of historical and projected future changes
Source: Copernicus journal article supplement (doi:10.5194/acp-13-7997-2013), 2013-08-20
Supplement: Supplementary file [file acp-13-7997-2013-supplement.pdf]

Supplement to: Multi-model mean nitrogen and sulfur deposition from the Atmospheric Chemistry and Climate Model Intercomparison Project (ACCMIP): evaluation and historical and projected changes by Lamarque et al.

This supplement contains

Table S1: Model description, adapted from Lamarque et al. (2013)

Table S2: Regional mean and standard deviation (amongst models) of dry deposition, wet deposition and associated  $\text{NO}_x$  emissions over the 1850-2000 (Table S2a), 2030 (Table S2b) and 2100 (Table S2c)

Table S3: Regional mean and standard deviation (amongst models) of dry deposition, wet deposition and associated  $\text{NH}_x$  emissions over the 1850-2000 (Table S3a), 2030 (Table S3b) and 2100 (Table S3c)

Table S4: Regional mean and standard deviation (amongst models) of dry deposition, wet deposition and associated  $\text{SO}_x$  emissions over the 1850-2000 (Table S4a), 2030 (Table S4b) and 2100 (Table S4c)

Table S5: Contribution of each model to deposition diagnostics for each time-slice

Table S6: Geographical information on ice-core locations used in this study

Figure S1a. Change (2000-1980) in anthropogenic emissions of NO over the United States and Europe.

Figure S1b. Change (2000-1980) in anthropogenic emissions of  $\text{NH}_3$  over the United States and Europe.

Figure S1c. Change (2000-1980) in anthropogenic emissions of  $\text{SO}_2$  over the United States and Europe.

Only the anthropogenic portion of the emissions is shown in Fig.1 since that is the largest contributor to changes over the 1980-2000 period.

Figure S2. Comparison of the precipitation change in the ACCMIP MMM and in the CMAP precipitation dataset (Xie and Arkin, 1997).

Figure S3. Comparison of annual total precipitation in the ACCMIP MMM against the gauge-based precipitation measurements that are available for the period of 1995 to 2004 and cover large areas in the Arctic (Yang et al., 2005), available [http://ine.uaf.edu/werc/people/yang/yang\\_files/MonthlySum/](http://ine.uaf.edu/werc/people/yang/yang_files/MonthlySum/)

Figure S4. Inter-model standard deviation (in %) of the  $\text{NO}_y$  wet deposition. The standard deviation is only shown for regions where deposition is larger than  $50 \text{ mg(N)}/\text{m}^2/\text{year}$  (see Fig. 5a). The number of models used for each time slice is shown in Table S2.

Figure S5. Multi-model mean evolution of a) total nitrogen and b) sulfur deposition (in  $\text{mg(N or S)}/\text{m}^2/\text{yr}$ ) relative to year 2000.

## References

- Josse, B., Simon, P., Peuch, V. H.: Radon global simulations with the multiscale chemistry and transport model MOCAGE, *Tellus-B*, 56, 339-356, 2004.
- Koch, D., G.A. Schmidt, and C.V. Field. Sulfur, sea salt and radionuclide aerosols in GISS ModelE. *J. Geophys. Res.*, **111**, D06206, doi:10.1029/2004JD005550, 2006.
- Lamarque, J.-F., G. P. Kyle, M. Meinshausen, K. Riahi, S. J. Smith, D. P. van Vuuren, A. Conley, F. Vitt. Global and regional evolution of short-lived radiatively-active gases and aerosols in the Representative Concentration Pathways. *Climatic Change*, doi:10.1007/s10584-011-0155-0, 2011.
- Lamarque, J.-F., Shindell, D. T., Josse, B., Young, P. J., Cionni, I., Eyring, V., Bergmann, D., Cameron-Smith, P., Collins, W. J., Doherty, R., Dalsoren, S., Faluvegi, G., Folberth, G., Ghan, S. J., Horowitz, L. W., Lee, Y. H., MacKenzie, I. A., Nagashima, T., Naik, V., Plummer, D., Righi, M., Rumbold, S., Schulz, M., Skeie, R. B., Stevenson, D. S., Strode, S., Sudo, K., Szopa, S., Voulgarakis, A., and Zeng, G.: The Atmospheric Chemistry and Climate Model Intercomparison Project (ACCMIP): overview and description of models, simulations and climate diagnostics, *Geosci. Model Dev.*, 6, 179-206, doi:10.5194/gmd-6-179-2013, 2013.
- Lamarque, J.-F., L. K. Emmons, P. G. Hess, D. E. Kinnison, S. Tilmes, F. Vitt, C. L. Heald, E. A. Holland, P. H. Lauritzen, J. Neu, J. J. Orlando, P. Rasch, G. Tyndall. CAM-chem: description and evaluation of interactive atmospheric chemistry in CESM. *Geosci. Mod. Dev.*, 5, 369-411, doi:10.5194/gmd-5-369-2012, 2012.
- Lee, Y. H., and Adams, P. J.: A Fast and Efficient Version of the Two-Moment Aerosol Sectional (TOMAS) Global Aerosol Microphysics Model, *Aerosol Science and Technology*, 46, 678-689, 10.1080/02786826.2011.643259, 2011.
- Liu, X., R. C. Easter, S. J. Ghan, R. Zaveri, P. Rasch, X. Shi, J.-F. Lamarque, A. Gettelman, H. Morrison, F. Vitt, A. Conley, S. Park, R. Neale, C. Hannay, A. M. L. Ekman, P. Hess, N. Mahowald, W. Collins, M. J. Iacono, C. S. Bretherton, M. G. Flanner, and D. Mitchell, 2012: Toward a minimal representation of aerosols in climate models: Description and evaluation in the Community Atmosphere Model CAM5. *Geosci. Model Dev.*, 5, 709-739, doi:10.5194/gmd-5-709-2012.
- Oman, L.D., J. R. Ziemke, A. R. Douglass, D.W. Waugh, C. Lang, J.M. Rodriguez, and J.E. Nielsen, The response of tropical tropospheric ozone to ENSO, *Geophys. Res. Lett.*, 38, L13706, doi:10.1029/2011GL047865, 2011.
- Scinocca, J. F., N. A. McFarlane, M. Lazare, J. Li and D. Plummer, Technical Note: The CCCma third generation AGCM and its extension into the middle atmosphere, *Atmos. Chem. Phys.*, 8, 7055-7074, doi:10.5194/acp-8-7055-2008, 2008.

Shindell, D. T., Pechony, O., Voulgarakis, A., Faluvegi, G., Nazarenko, L., Lamarque, J.-F., Bowman, K., Milly, G., Kovari, B., Ruedy, R., and Schmidt, G.: Interactive ozone and methane chemistry in GISS-E2 historical and future climate simulations, *Atmos. Chem. Phys.*, 13, 2653-2689, doi:10.5194/acp-13-2653-2013, 2013.

Skeie, R. B., Berntsen, T. K., Myhre, G., Tanaka, K., Kvalevag, M. M. et al.: Anthropogenic radiative forcing time series from pre-industrial times until 2010, *Atmospheric Chemistry and Physics*, 11(22), 11827-11857, 2011.

Stevenson, D. S., R. M. Doherty, M. G. Sanderson, W. J. Collins, C. E. Johnson, and R. G. Derwent, Radiative forcing from aircraft NO<sub>x</sub> emissions: Mechanisms and seasonal dependence, *J. Geophys. Res.*, 109, D17307, doi:10.1029/2004JD004759, 2004.

Teyssède, H., Michou, M., Clark, H. L., Josse, B., Karcher, F., Olivie, D., Peuch, V.-H., Saint-Martin, D., Cariolle, D., Attié, J.-L., Nédélec, P., Ricaud, P., Thouret, V., van der A, R. J., Volz-Thomas, A., and Chéroux, F.: A new tropospheric and stratospheric Chemistry and Transport Model MOCAGE-Climat for multi-year studies: evaluation of the present-day climatology and sensitivity to surface processes, *Atmos. Chem. Phys.*, 7, 5815-5860, doi:10.5194/acp-7-5815-2007, 2007.

Xie, P., and P.A. Arkin, 1997: Global precipitation: A 17-year monthly analysis based on gauge observations, satellite estimates, and numerical model outputs. *Bull. Amer. Meteor. Soc.*, 78, 2539 - 2558.

Yang, D., D. Kane, Z. Zhang, D. Legates and B. Goodison. Bias-corrections of long-term (1973-2004) daily precipitation data over the northern regions, *Geophysical Research Letters*, vol. 32, L19501, doi:10.1029/2005GL024057, 2005.

Zeng, G., Pyle, J. A., and Young, P. J.: Impact of climate change on tropospheric ozone and its global budgets, *Atmos. Chem. Phys.*, 8, 369-387, doi:http://dx.doi.org/10.5194/acp-8-369-200810.5194/acp-8-369-2008, 2008.

Zeng, G., Morgenstern, O., Braesicke, P., and Pyle, J. A.: Impact of stratospheric ozone recovery on tropospheric ozone and its budget, *Geophys. Res. Lett.*, 37, L09805, doi:http://dx.doi.org/10.1029/2010GL04281210.1029/2010GL042812, 2010.

| Model                     | Modelling Center                        | Model Contact                               | Resolution (lat/lon/lev), Top Level | NO <sub>y</sub> deposition | NH <sub>x</sub> deposition | SO <sub>x</sub> deposition | Reference                                    |
|---------------------------|-----------------------------------------|---------------------------------------------|-------------------------------------|----------------------------|----------------------------|----------------------------|----------------------------------------------|
| <b>CESM-CAM-Superfast</b> | LLNL, USA                               | Dan Bergmann, Philip Cameron-Smith          | 1.875/2.5/L26, 3.5hPa               | X                          |                            | X                          | Lamarque et al, 2012                         |
| <b>CICERO-OsloCTM2</b>    | CICERO, Norway                          | Stig Dalsoren, Ragnhild Skeie               | 2.8/2.6/L60, 0.11 hPa               | X                          | X                          | X                          | Skeie et al., 2011                           |
| <b>CMAM</b>               | CCCMA, Environment Canada, Canada       | David Plummer                               | 3.75/3.75/L71, 0.00081hPa           | X                          |                            |                            | Scinocca et al, 2008                         |
| <b>GEOSCCM</b>            | NASA GSFC, USA                          | Sarah Strode                                | 2/2.5/L72, 0.01hPa                  | X                          |                            |                            | Oman et al, 2011                             |
| <b>GISS-E2-R</b>          | NASA-GISS, USA                          | Drew Shindell, Greg Faluvegi,               | 2/2.5/L40, 0.14hPa                  | X                          | X                          | X                          | Koch et al, 2006 ; Shindell et al, 2013      |
| <b>GISS-E2-R-TOMAS</b>    | NASA-GISS, USA                          | Drew Shindell, Greg Faluvegi, Yunha Lee     | 2/2.5/L40, 0.14hPa                  | X                          |                            |                            | Shindell et al, 2013; Lee and Adams, 2011    |
| <b>MOCAGE</b>             | GAME/CNRM, MétéoFrance, France          | Béatrice Josse                              | 2.0/2.0/L47, 6.9 hpa                | X                          |                            |                            | Josse et al, 2004<br>Teyssède et al, 2007    |
| <b>NCAR-CAM3.5</b>        | NCAR ESL, USA                           | Jean-François Lamarque                      | 1.875/2.5/L26, 3.5hPa               | X                          | X                          | X                          | Lamarque et al, 2011<br>Lamarque et al, 2012 |
| <b>NCAR-CAM5.1</b>        | PNNL, USA                               | Steven Ghan                                 | 1.875/2.5/L30, 3.5hPa               |                            |                            | X                          | Liu et al, 2012                              |
| <b>STOC-HadAM3</b>        | University of Edinburgh, United Kingdom | Ian McKenzie, David Stevenson, Ruth Doherty | 5.0/5.0/L19 50hPa                   | X                          | X                          | X                          | Stevenson et al, 2004                        |
| <b>UM-CAM</b>             | NIWA, New Zealand                       | Guang Zeng                                  | 2.5/3.75/L19, 4.6hPa                | X                          |                            |                            | Zeng et al, 2008, 2010                       |

**Table S1.** Model description summary, adapted from Lamarque et al. (2013).

|                           | historical |      |      |      |      |      |
|---------------------------|------------|------|------|------|------|------|
|                           | 1850       |      | 1980 |      | 2000 |      |
|                           | mean       | sdev | mean | sdev | mean | sdev |
| dry deposition            |            |      |      |      |      |      |
| North America             | 0.5        | 0.2  | 2.8  | 0.8  | 2.9  | 0.8  |
| Central + South America   | 0.5        | 0.3  | 0.9  | 0.4  | 1.0  | 0.4  |
| Africa                    | 1.3        | 0.6  | 2.6  | 0.7  | 2.7  | 0.7  |
| Europe                    | 0.2        | 0.1  | 1.6  | 0.5  | 1.4  | 0.4  |
| Former USSR + Middle East | 0.4        | 0.1  | 2.8  | 0.8  | 2.4  | 0.6  |
| Asia                      | 0.6        | 0.3  | 2.1  | 0.6  | 3.6  | 1.1  |
| Oceania                   | 0.2        | 0.1  | 0.3  | 0.1  | 0.3  | 0.1  |
| Continents                | 3.8        | 1.6  | 13.1 | 3.5  | 14.4 | 3.8  |
| Ocean                     | 1.4        | 0.6  | 5.3  | 2.0  | 6.4  | 2.3  |
| Global                    | 5.2        | 1.8  | 18.4 | 5.1  | 20.7 | 5.6  |
| wet deposition            |            |      |      |      |      |      |
| North America             | 0.6        | 0.2  | 2.7  | 0.5  | 2.9  | 0.6  |
| Central + South America   | 0.9        | 0.4  | 1.3  | 0.5  | 1.5  | 0.6  |
| Africa                    | 1.6        | 0.4  | 2.7  | 0.5  | 2.8  | 0.5  |
| Europe                    | 0.2        | 0.0  | 1.4  | 0.4  | 1.3  | 0.3  |
| Former USSR + Middle East | 0.5        | 0.1  | 2.9  | 0.7  | 2.5  | 0.6  |
| Asia                      | 1.1        | 0.3  | 2.6  | 0.5  | 4.0  | 0.8  |
| Oceania                   | 0.3        | 0.1  | 0.4  | 0.1  | 0.4  | 0.1  |
| Continents                | 5.3        | 1.4  | 14.0 | 2.9  | 15.4 | 3.0  |
| Ocean                     | 5.8        | 2.4  | 12.3 | 3.2  | 14.5 | 3.9  |
| Global                    | 11.1       | 2.8  | 26.3 | 4.3  | 30.0 | 4.7  |
| emissions                 |            |      |      |      |      |      |
| North America             | 1.6        | 0.3  | 7.7  | 0.4  | 7.9  | 0.4  |
| Central + South America   | 2.4        | 1.0  | 3.5  | 1.0  | 3.9  | 0.9  |
| Africa                    | 4.0        | 1.2  | 6.4  | 1.0  | 6.5  | 1.0  |
| Europe                    | 0.4        | 0.1  | 4.7  | 0.2  | 4.1  | 0.2  |
| Former USSR + Middle East | 1.0        | 0.3  | 5.8  | 0.3  | 4.8  | 0.3  |
| Asia                      | 2.3        | 0.9  | 5.9  | 0.9  | 9.8  | 1.0  |
| Oceania                   | 0.8        | 0.2  | 1.1  | 0.2  | 1.2  | 0.2  |
| Continents                | 12.5       | 3.9  | 35.0 | 3.4  | 38.2 | 3.5  |
| Ocean                     | 1.4        | 0.8  | 6.0  | 1.3  | 8.1  | 1.7  |
| Global                    | 13.9       | 4.5  | 41.0 | 3.9  | 46.3 | 4.2  |
| Number of models          | 10         |      | 10   |      | 10   |      |

Table S2a. Multi-model mean and standard deviation regional deposition and emission (Tg(N)/yr) from NO<sub>x</sub> emissions for the historical period. Note that the emissions are not fully consistent with Table 2 or the deposition fields as several models only provided global numbers for lightning and/or natural emissions.

|                           | 2030  |      |       |      |       |      |
|---------------------------|-------|------|-------|------|-------|------|
|                           | RCP26 |      | RCP45 |      | RCP85 |      |
| dry deposition            | mean  | sdev | mean  | sdev | mean  | sdev |
| North America             | 1.3   | 0.4  | 1.4   | 0.4  | 1.8   | 0.5  |
| Central + South America   | 0.6   | 0.3  | 0.9   | 0.5  | 1.0   | 0.5  |
| Africa                    | 2.4   | 0.6  | 3.2   | 0.9  | 3.1   | 0.8  |
| Europe                    | 0.9   | 0.3  | 0.9   | 0.3  | 1.0   | 0.3  |
| Former USSR + Middle East | 1.7   | 0.4  | 2.2   | 0.7  | 2.8   | 0.8  |
| Asia                      | 4.2   | 1.5  | 5.4   | 1.9  | 6.4   | 1.9  |
| Oceania                   | 0.2   | 0.1  | 0.3   | 0.1  | 0.3   | 0.1  |
| Continents                | 11.3  | 3.4  | 14.3  | 4.5  | 16.3  | 4.6  |
| Ocean                     | 5.7   | 1.9  | 6.0   | 2.1  | 6.8   | 2.0  |
| Global                    | 17.0  | 5.1  | 20.3  | 6.3  | 23.1  | 6.3  |

|                           | mean | sdev | mean | sdev | mean | sdev |
|---------------------------|------|------|------|------|------|------|
| wet deposition            |      |      |      |      |      |      |
| North America             | 1.4  | 0.2  | 1.4  | 0.3  | 1.8  | 0.2  |
| Central + South America   | 1.0  | 0.3  | 1.1  | 0.4  | 1.2  | 0.3  |
| Africa                    | 2.5  | 0.2  | 2.7  | 0.1  | 2.8  | 0.3  |
| Europe                    | 0.7  | 0.2  | 0.8  | 0.2  | 0.8  | 0.2  |
| Former USSR + Middle East | 1.6  | 0.3  | 1.9  | 0.4  | 2.3  | 0.4  |
| Asia                      | 4.2  | 0.8  | 4.9  | 0.6  | 5.6  | 0.8  |
| Oceania                   | 0.3  | 0.1  | 0.3  | 0.1  | 0.3  | 0.1  |
| Continents                | 11.8 | 1.3  | 13.1 | 1.3  | 14.9 | 1.5  |
| Ocean                     | 13.7 | 4.1  | 14.5 | 5.4  | 15.0 | 4.4  |
| Global                    | 25.4 | 5.0  | 27.6 | 6.6  | 29.9 | 5.4  |

|                           | mean | sdev | mean | sdev | mean | sdev |
|---------------------------|------|------|------|------|------|------|
| emissions                 |      |      |      |      |      |      |
| North America             | 3.6  | 0.5  | 3.4  | 0.5  | 4.3  | 0.5  |
| Central + South America   | 3.0  | 1.1  | 3.3  | 1.0  | 3.6  | 1.1  |
| Africa                    | 6.5  | 1.4  | 6.8  | 1.2  | 7.1  | 1.3  |
| Europe                    | 2.3  | 0.2  | 2.1  | 0.2  | 2.4  | 0.3  |
| Former USSR + Middle East | 3.3  | 0.3  | 4.0  | 0.3  | 5.4  | 0.4  |
| Asia                      | 11.4 | 1.6  | 12.2 | 1.8  | 15.3 | 1.3  |
| Oceania                   | 0.8  | 0.2  | 0.8  | 0.3  | 0.9  | 0.2  |
| Continents                | 30.9 | 5.0  | 32.6 | 5.1  | 39.0 | 4.9  |
| Ocean                     | 8.2  | 1.3  | 8.6  | 0.6  | 9.1  | 1.3  |
| Global                    | 39.1 | 5.9  | 41.1 | 5.3  | 48.1 | 5.8  |
| Number of models          | 6    |      | 4    |      | 7    |      |

Table S2b. Multi-model mean and standard deviation regional deposition and emission (Tg(N)/yr) from NO<sub>x</sub> emissions for 2030. Note that the emissions are not fully consistent with deposition fields as several models only provided global numbers for lightning and/or natural emissions.

|                           | 2100  |      |       |      |       |      |
|---------------------------|-------|------|-------|------|-------|------|
|                           | RCP26 |      | RCP45 |      | RCP85 |      |
|                           | mean  | sdev | mean  | sdev | mean  | sdev |
| dry deposition            |       |      |       |      |       |      |
| North America             | 0.5   | 0.2  | 0.8   | 0.3  | 1.1   | 0.4  |
| Central + South America   | 0.6   | 0.3  | 0.7   | 0.4  | 0.8   | 0.4  |
| Africa                    | 2.4   | 0.7  | 2.7   | 1.0  | 2.9   | 1.0  |
| Europe                    | 0.3   | 0.1  | 0.5   | 0.2  | 0.6   | 0.2  |
| Former USSR + Middle East | 1.0   | 0.3  | 1.0   | 0.4  | 1.6   | 0.5  |
| Asia                      | 2.0   | 0.8  | 1.9   | 0.8  | 2.5   | 0.8  |
| Oceania                   | 0.1   | 0.1  | 0.2   | 0.1  | 0.2   | 0.1  |
| Continents                | 6.8   | 2.2  | 7.8   | 2.9  | 9.7   | 3.2  |
| Ocean                     | 2.6   | 1.0  | 3.3   | 1.1  | 4.7   | 1.5  |
| Global                    | 9.4   | 3.2  | 11.1  | 3.8  | 14.4  | 4.4  |

|                           | mean | sdev | mean | sdev | mean | sdev |
|---------------------------|------|------|------|------|------|------|
| wet deposition            |      |      |      |      |      |      |
| North America             | 0.7  | 0.2  | 1.0  | 0.2  | 1.4  | 0.2  |
| Central + South America   | 0.9  | 0.3  | 0.9  | 0.3  | 1.1  | 0.3  |
| Africa                    | 2.7  | 0.3  | 2.5  | 0.1  | 3.0  | 0.4  |
| Europe                    | 0.3  | 0.1  | 0.5  | 0.1  | 0.5  | 0.1  |
| Former USSR + Middle East | 0.9  | 0.2  | 1.1  | 0.2  | 1.6  | 0.3  |
| Asia                      | 2.2  | 0.5  | 2.2  | 0.4  | 3.0  | 0.5  |
| Oceania                   | 0.2  | 0.1  | 0.3  | 0.1  | 0.3  | 0.1  |
| Continents                | 7.9  | 1.0  | 8.4  | 1.0  | 11.0 | 1.3  |
| Ocean                     | 8.8  | 3.4  | 10.2 | 4.5  | 12.4 | 4.1  |
| Global                    | 16.7 | 4.2  | 18.6 | 5.5  | 23.4 | 4.9  |

|                           | mean | sdev | mean | sdev | mean | sdev |
|---------------------------|------|------|------|------|------|------|
| emissions                 |      |      |      |      |      |      |
| North America             | 1.5  | 0.4  | 2.2  | 0.5  | 3.0  | 0.7  |
| Central + South America   | 2.8  | 1.1  | 2.4  | 1.1  | 3.0  | 1.3  |
| Africa                    | 7.3  | 1.4  | 6.1  | 1.4  | 7.2  | 1.7  |
| Europe                    | 0.8  | 0.2  | 1.2  | 0.2  | 1.4  | 0.3  |
| Former USSR + Middle East | 2.1  | 0.3  | 1.9  | 0.4  | 3.3  | 0.5  |
| Asia                      | 5.9  | 1.4  | 5.0  | 1.6  | 6.9  | 1.6  |
| Oceania                   | 0.6  | 0.2  | 0.7  | 0.3  | 0.8  | 0.3  |
| Continents                | 21.1 | 4.9  | 19.5 | 5.4  | 25.6 | 6.1  |
| Ocean                     | 2.9  | 1.1  | 5.3  | 0.6  | 7.8  | 1.3  |
| Global                    | 24.0 | 5.8  | 24.8 | 5.8  | 33.4 | 7.1  |
| Number of models          | 6    |      | 4    |      | 7    |      |

Table S2c. Multi-model mean and standard deviation regional deposition and emission (Tg(N)/yr) from NO<sub>x</sub> emissions for 2100. Note that the emissions are not fully consistent with deposition fields as several models only provided global numbers for lightning and/or natural emissions.

|                           | historical |      |      |      |      |      |
|---------------------------|------------|------|------|------|------|------|
|                           | 1850       |      | 1980 |      | 2000 |      |
|                           | mean       | sdev | mean | sdev | mean | sdev |
| dry deposition            |            |      |      |      |      |      |
| North America             | 0.9        | 0.3  | 1.4  | 0.5  | 1.6  | 0.5  |
| Central + South America   | 0.6        | 0.2  | 1.9  | 0.3  | 1.8  | 0.3  |
| Africa                    | 1.1        | 0.3  | 2.5  | 0.4  | 2.2  | 0.4  |
| Europe                    | 0.2        | 0.1  | 1.0  | 0.3  | 1.4  | 0.4  |
| Former USSR + Middle East | 0.6        | 0.2  | 1.6  | 0.7  | 1.8  | 0.7  |
| Asia                      | 1.5        | 0.3  | 4.5  | 1.1  | 5.5  | 1.4  |
| Oceania                   | 0.2        | 0.1  | 0.3  | 0.1  | 0.3  | 0.1  |
| Continents                | 5.2        | 1.2  | 13.3 | 3.1  | 14.6 | 3.4  |
| Ocean                     | 3.0        | 1.2  | 4.5  | 1.9  | 4.9  | 2.0  |
| Global                    | 8.2        | 2.2  | 17.8 | 4.6  | 19.5 | 5.0  |

|                           | mean | sdev | mean | sdev | mean | sdev |
|---------------------------|------|------|------|------|------|------|
| wet deposition            |      |      |      |      |      |      |
| North America             | 0.9  | 0.2  | 2.1  | 0.5  | 2.2  | 0.4  |
| Central + South America   | 0.7  | 0.3  | 1.8  | 0.6  | 1.7  | 0.6  |
| Africa                    | 0.9  | 0.4  | 2.1  | 0.7  | 1.9  | 0.6  |
| Europe                    | 0.3  | 0.0  | 1.3  | 0.3  | 1.4  | 0.2  |
| Former USSR + Middle East | 0.7  | 0.2  | 2.6  | 0.8  | 2.8  | 0.7  |
| Asia                      | 1.3  | 0.5  | 4.5  | 1.8  | 6.0  | 2.1  |
| Oceania                   | 0.2  | 0.1  | 0.3  | 0.1  | 0.3  | 0.1  |
| Continents                | 4.9  | 1.5  | 14.8 | 3.2  | 16.3 | 3.6  |
| Ocean                     | 7.2  | 1.5  | 11.9 | 2.4  | 13.2 | 2.6  |
| Global                    | 12.1 | 2.3  | 26.7 | 4.3  | 29.5 | 4.8  |

|                           | mean | sdev | mean | sdev | mean | sdev |
|---------------------------|------|------|------|------|------|------|
| emissions                 |      |      |      |      |      |      |
| North America             | 2.3  | 0.0  | 4.0  | 0.1  | 4.3  | 0.1  |
| Central + South America   | 0.9  | 0.3  | 4.3  | 0.3  | 3.9  | 0.3  |
| Africa                    | 2.1  | 0.3  | 5.5  | 0.3  | 4.7  | 0.3  |
| Europe                    | 0.6  | 0.0  | 3.3  | 0.1  | 4.1  | 0.1  |
| Former USSR + Middle East | 1.4  | 0.1  | 4.0  | 0.2  | 4.5  | 0.2  |
| Asia                      | 3.4  | 0.1  | 12.5 | 0.3  | 16.0 | 0.4  |
| Oceania                   | 0.5  | 0.0  | 0.9  | 0.0  | 0.8  | 0.0  |
| Continents                | 1.2  | 0.9  | 34.6 | 0.8  | 38.3 | 0.9  |
| Ocean                     | 8.3  | 0.7  | 10.1 | 1.3  | 10.6 | 1.5  |
| Global                    | 9.5  | 1.1  | 44.6 | 1.3  | 48.9 | 1.5  |
| Number of models          | 5    |      | 5    |      | 5    |      |

Table S3a. Multi-model mean and standard deviation regional deposition and emission (Tg(N)/yr) from NH<sub>x</sub> emissions for the historical period. Note that the CICERO-OsloCTM2 emissions are excluded from the emissions table since their natural emissions were only provided for this study as a global integral.



|                           | 2030  |      |       |      |       |      |
|---------------------------|-------|------|-------|------|-------|------|
|                           | RCP26 |      | RCP45 |      | RCP85 |      |
| dry deposition            | mean  | sdev | mean  | sdev | mean  | sdev |
| North America             | 2.7   | 0.3  | 2.4   | 0.0  | 2.7   | 0.3  |
| Central + South America   | 2.6   | 0.3  | 2.0   | 0.2  | 2.8   | 0.3  |
| Africa                    | 3.2   | 0.3  | 2.5   | 0.1  | 3.2   | 0.3  |
| Europe                    | 1.7   | 0.4  | 1.5   | 0.2  | 2.2   | 0.5  |
| Former USSR + Middle East | 2.7   | 0.7  | 2.0   | 0.1  | 3.1   | 0.8  |
| Asia                      | 8.8   | 1.9  | 6.5   | 0.5  | 7.7   | 1.8  |
| Oceania                   | 0.5   | 0.1  | 0.3   | 0.0  | 0.5   | 0.1  |
| Continents                | 22.2  | 3.6  | 17.2  | 0.4  | 22.1  | 3.9  |
| Ocean                     | 7.8   | 3.2  | 6.0   | 2.7  | 7.6   | 2.9  |
| Global                    | 30.0  | 5.6  | 23.1  | 2.3  | 29.7  | 5.6  |

  

|                           | mean | sdev | mean | sdev | mean | sdev |
|---------------------------|------|------|------|------|------|------|
| wet deposition            |      |      |      |      |      |      |
| North America             | 2.0  | 0.4  | 2.2  | 0.2  | 2.2  | 0.3  |
| Central + South America   | 2.0  | 0.9  | 1.9  | 0.7  | 2.2  | 1.0  |
| Africa                    | 2.4  | 0.9  | 2.2  | 0.6  | 2.4  | 0.8  |
| Europe                    | 1.0  | 0.3  | 1.2  | 0.3  | 1.3  | 0.4  |
| Former USSR + Middle East | 2.2  | 0.5  | 2.7  | 0.1  | 2.8  | 0.7  |
| Asia                      | 7.3  | 3.5  | 7.0  | 2.5  | 6.9  | 2.6  |
| Oceania                   | 0.3  | 0.1  | 0.3  | 0.1  | 0.3  | 0.1  |
| Continents                | 17.3 | 6.4  | 17.6 | 4.5  | 18.2 | 5.5  |
| Ocean                     | 12.8 | 1.4  | 12.8 | 0.9  | 13.2 | 1.5  |
| Global                    | 30.0 | 6.3  | 30.4 | 3.6  | 31.4 | 5.7  |

  

|                           | mean | sdev | mean | sdev | mean | sdev |
|---------------------------|------|------|------|------|------|------|
| emissions                 |      |      |      |      |      |      |
| North America             | 5.1  | 0.1  | 5.1  | 0.1  | 5.4  | 0.0  |
| Central + South America   | 5.3  | 0.3  | 4.4  | 0.3  | 5.8  | 0.3  |
| Africa                    | 6.7  | 0.3  | 5.2  | 0.3  | 6.7  | 0.3  |
| Europe                    | 3.8  | 0.1  | 4.1  | 0.0  | 5.0  | 0.1  |
| Former USSR + Middle East | 5.1  | 0.2  | 4.7  | 0.1  | 6.2  | 0.2  |
| Asia                      | 22.1 | 0.6  | 19.5 | 0.1  | 19.9 | 0.5  |
| Oceania                   | 1.0  | 0.0  | 0.9  | 0.0  | 1.0  | 0.0  |
| Continents                | 49.0 | 0.9  | 43.9 | 0.9  | 50.0 | 0.9  |
| Ocean                     | 11.4 | 2.0  | 9.7  | 0.6  | 11.8 | 2.0  |
| Global                    | 60.4 | 1.5  | 53.6 | 0.4  | 61.7 | 1.5  |
| Number of models          | 3    |      | 2    |      | 3    |      |

Table S3b. Multi-model mean and standard deviation regional deposition and emission (Tg(N)/yr) from NH<sub>x</sub> emissions for 2030.

|                           | 2100  |      |       |      |       |      |
|---------------------------|-------|------|-------|------|-------|------|
|                           | RCP26 |      | RCP45 |      | RCP85 |      |
| dry deposition            | mean  | sdev | mean  | sdev | mean  | sdev |
| North America             | 3.6   | 0.5  | 2.8   | 0.2  | 4.0   | 0.4  |
| Central + South America   | 3.7   | 0.6  | 2.1   | 0.4  | 3.6   | 0.6  |
| Africa                    | 4.6   | 0.6  | 2.8   | 0.3  | 5.1   | 0.7  |
| Europe                    | 1.8   | 0.3  | 1.3   | 0.1  | 2.7   | 0.5  |
| Former USSR + Middle East | 3.7   | 0.7  | 2.1   | 0.1  | 4.4   | 1.0  |
| Asia                      | 13.5  | 2.8  | 6.9   | 0.5  | 10.1  | 1.9  |
| Oceania                   | 0.6   | 0.1  | 0.4   | 0.0  | 0.7   | 0.1  |
| Continents                | 31.4  | 4.5  | 18.4  | 0.3  | 30.7  | 4.5  |
| Ocean                     | 11.3  | 5.8  | 7.2   | 4.0  | 11.0  | 5.4  |
| Global                    | 42.7  | 8.4  | 25.6  | 4.3  | 41.6  | 7.7  |

|                           | mean | sdev | mean | sdev | mean | sdev |
|---------------------------|------|------|------|------|------|------|
| wet deposition            |      |      |      |      |      |      |
| North America             | 2.3  | 0.9  | 2.2  | 0.6  | 2.7  | 0.9  |
| Central + South America   | 2.7  | 1.6  | 2.0  | 0.9  | 2.7  | 1.6  |
| Africa                    | 3.1  | 1.5  | 2.2  | 1.0  | 3.9  | 2.3  |
| Europe                    | 1.0  | 0.5  | 1.0  | 0.4  | 1.4  | 0.8  |
| Former USSR + Middle East | 2.3  | 0.8  | 2.0  | 0.3  | 3.0  | 0.9  |
| Asia                      | 9.5  | 7.0  | 6.6  | 4.2  | 7.3  | 4.4  |
| Oceania                   | 0.4  | 0.2  | 0.4  | 0.1  | 0.4  | 0.2  |
| Continents                | 21.3 | 12.0 | 16.4 | 7.5  | 21.5 | 11.0 |
| Ocean                     | 13.7 | 1.6  | 11.6 | 0.7  | 14.0 | 1.8  |
| Global                    | 34.9 | 12.0 | 28.0 | 6.9  | 35.6 | 11.0 |

|                           | mean | sdev | mean | sdev | mean | sdev |
|---------------------------|------|------|------|------|------|------|
| emissions                 |      |      |      |      |      |      |
| North America             | 6.2  | 0.1  | 5.3  | 0.1  | 7.2  | 0.1  |
| Central + South America   | 7.2  | 0.4  | 4.4  | 0.3  | 7.3  | 0.3  |
| Africa                    | 9.1  | 0.2  | 5.8  | 0.3  | 11.4 | 0.3  |
| Europe                    | 3.3  | 0.0  | 3.2  | 0.0  | 5.4  | 0.1  |
| Former USSR + Middle East | 6.4  | 0.2  | 4.4  | 0.1  | 8.0  | 0.2  |
| Asia                      | 30.6 | 0.8  | 18.4 | 0.0  | 23.2 | 0.5  |
| Oceania                   | 1.3  | 0.0  | 1.0  | 0.0  | 1.4  | 0.0  |
| Continents                | 64.0 | 1.1  | 42.4 | 0.8  | 63.8 | 1.1  |
| Ocean                     | 12.6 | 2.5  | 9.6  | 0.6  | 12.7 | 2.3  |
| Global                    | 76.6 | 1.7  | 52.0 | 0.3  | 76.5 | 1.7  |
| Number of models          | 3    |      | 2    |      | 3    |      |

Table S3c. Multi-model mean and standard deviation regional deposition and emission (Tg(N)/yr) from NH<sub>x</sub> emissions for 2100.

|                           | historical |      |      |      |      |      |
|---------------------------|------------|------|------|------|------|------|
|                           | 1850       |      | 1980 |      | 2000 |      |
|                           | mean       | sdev | mean | sdev | mean | sdev |
| dry deposition            |            |      |      |      |      |      |
| North America             | 0.4        | 0.3  | 6.2  | 1.1  | 4.1  | 1.0  |
| Central + South America   | 0.3        | 0.1  | 1.3  | 0.3  | 1.1  | 0.3  |
| Africa                    | 0.5        | 0.1  | 2.4  | 0.4  | 2.1  | 0.4  |
| Europe                    | 0.4        | 0.2  | 8.9  | 1.3  | 2.7  | 0.6  |
| Former USSR + Middle East | 0.3        | 0.2  | 5.2  | 0.5  | 3.7  | 0.7  |
| Asia                      | 0.5        | 0.2  | 4.7  | 1.0  | 6.8  | 1.6  |
| Oceania                   | 0.2        | 0.1  | 0.5  | 0.1  | 0.6  | 0.1  |
| Continents                | 2.7        | 1.1  | 29.2 | 4.3  | 21.0 | 4.6  |
| Ocean                     | 8.4        | 3.9  | 17.7 | 6.6  | 15.7 | 5.8  |
| Global                    | 11.1       | 4.8  | 46.8 | 9.7  | 36.7 | 9.5  |

|                           | mean | sdev | mean | sdev | mean | sdev |
|---------------------------|------|------|------|------|------|------|
| wet deposition            |      |      |      |      |      |      |
| North America             | 0.8  | 0.3  | 4.7  | 0.8  | 4.1  | 0.8  |
| Central + South America   | 1.3  | 0.4  | 2.1  | 0.5  | 2.2  | 0.5  |
| Africa                    | 0.7  | 0.2  | 2.3  | 0.4  | 2.3  | 0.4  |
| Europe                    | 0.5  | 0.2  | 3.3  | 0.7  | 1.8  | 0.5  |
| Former USSR + Middle East | 0.8  | 0.2  | 6.0  | 1.6  | 4.4  | 1.0  |
| Asia                      | 1.7  | 0.3  | 5.1  | 0.9  | 8.0  | 1.8  |
| Oceania                   | 0.4  | 0.0  | 0.6  | 0.1  | 0.6  | 0.1  |
| Continents                | 6.3  | 0.9  | 24.1 | 4.7  | 23.3 | 4.7  |
| Ocean                     | 16.7 | 2.3  | 27.7 | 4.2  | 27.6 | 3.6  |
| Global                    | 22.9 | 3.0  | 51.8 | 8.5  | 51.0 | 7.1  |

|                           | mean | sdev | mean | sdev | mean | sdev |
|---------------------------|------|------|------|------|------|------|
| emissions                 |      |      |      |      |      |      |
| North America             | 1.1  | 1.3  | 14.0 | 1.3  | 10.2 | 1.1  |
| Central + South America   | 2.1  | 1.3  | 4.3  | 1.2  | 4.1  | 1.3  |
| Africa                    | 0.5  | 0.3  | 3.9  | 0.3  | 3.4  | 0.3  |
| Europe                    | 1.2  | 0.7  | 18.9 | 0.5  | 6.4  | 0.5  |
| Former USSR + Middle East | 0.3  | 0.3  | 9.6  | 0.3  | 8.1  | 0.3  |
| Asia                      | 1.8  | 1.0  | 10.2 | 1.0  | 16.7 | 1.1  |
| Oceania                   | 0.5  | 0.3  | 1.2  | 0.3  | 1.5  | 0.3  |
| Continents                | 7.5  | 3.6  | 62.1 | 3.3  | 50.4 | 3.3  |
| Ocean                     | 21.0 | 10.0 | 30.2 | 11.0 | 30.2 | 10.0 |
| Global                    | 28.5 | 12.0 | 92.4 | 14.0 | 80.6 | 13.0 |
| Number of models          | 7    |      | 6    |      | 7    |      |

Table S4a. Multi-model mean and standard deviation regional deposition and emission (Tg(S)/yr) from SO<sub>x</sub> emissions for the historical period.

|                           | 2030  |      |       |      |       |      |
|---------------------------|-------|------|-------|------|-------|------|
|                           | RCP26 |      | RCP45 |      | RCP85 |      |
|                           | mean  | sdev | mean  | sdev | mean  | sdev |
| dry deposition            |       |      |       |      |       |      |
| North America             | 1.0   | 0.3  | 1.5   | 0.4  | 2.0   | 0.4  |
| Central + South America   | 1.1   | 0.3  | 1.0   | 0.4  | 0.9   | 0.2  |
| Africa                    | 2.0   | 0.4  | 2.7   | 0.5  | 2.4   | 0.4  |
| Europe                    | 0.6   | 0.2  | 1.0   | 0.3  | 0.8   | 0.2  |
| Former USSR + Middle East | 1.8   | 0.3  | 2.7   | 0.5  | 3.2   | 0.5  |
| Asia                      | 6.3   | 1.2  | 7.4   | 1.8  | 9.0   | 1.4  |
| Oceania                   | 0.3   | 0.1  | 0.5   | 0.2  | 0.3   | 0.1  |
| Continents                | 13.0  | 2.6  | 16.9  | 4.1  | 18.6  | 3.1  |
| Ocean                     | 10.7  | 5.2  | 14.5  | 7.8  | 12.5  | 5.7  |
| Global                    | 23.8  | 7.4  | 31.3  | 12.0 | 31.1  | 8.1  |

|                           | mean | sdev | mean | sdev | mean | sdev |
|---------------------------|------|------|------|------|------|------|
| wet deposition            |      |      |      |      |      |      |
| North America             | 1.3  | 0.4  | 1.9  | 0.2  | 2.2  | 0.4  |
| Central + South America   | 1.8  | 0.3  | 2.0  | 0.0  | 1.6  | 0.2  |
| Africa                    | 1.9  | 0.2  | 2.6  | 0.2  | 2.2  | 0.2  |
| Europe                    | 0.6  | 0.1  | 1.0  | 0.1  | 0.8  | 0.1  |
| Former USSR + Middle East | 1.8  | 0.1  | 3.1  | 0.5  | 2.9  | 0.3  |
| Asia                      | 6.7  | 1.1  | 8.4  | 1.3  | 8.4  | 1.5  |
| Oceania                   | 0.5  | 0.1  | 0.6  | 0.1  | 0.5  | 0.1  |
| Continents                | 14.6 | 1.5  | 19.7 | 2.3  | 18.7 | 2.1  |
| Ocean                     | 21.3 | 1.2  | 25.3 | 1.9  | 23.6 | 1.6  |
| Global                    | 36.0 | 2.7  | 45.1 | 4.2  | 42.3 | 3.7  |

|                           | mean | sdev | mean | sdev | mean | sdev |
|---------------------------|------|------|------|------|------|------|
| emissions                 |      |      |      |      |      |      |
| North America             | 2.7  | 1.6  | 3.7  | 0.0  | 5.0  | 1.6  |
| Central + South America   | 3.8  | 1.1  | 4.6  | 0.4  | 3.0  | 1.1  |
| Africa                    | 3.7  | 0.2  | 5.5  | 0.0  | 4.2  | 0.2  |
| Europe                    | 1.6  | 0.6  | 2.5  | 0.3  | 2.1  | 0.6  |
| Former USSR + Middle East | 3.7  | 0.3  | 5.9  | 0.0  | 6.9  | 0.3  |
| Asia                      | 15.1 | 1.0  | 19.0 | 0.4  | 20.4 | 0.9  |
| Oceania                   | 0.7  | 0.2  | 1.5  | 0.0  | 0.8  | 0.2  |
| Continents                | 31.3 | 3.1  | 42.7 | 0.2  | 42.5 | 3.0  |
| Ocean                     | 28.5 | 5.6  | 35.2 | 5.8  | 30.8 | 5.6  |
| Global                    | 59.8 | 7.9  | 77.9 | 5.6  | 73.3 | 7.6  |
| Number of models          | 4    |      | 2    |      | 4    |      |

Table S4b. Multi-model mean and standard deviation regional deposition and emission (Tg(S)/yr) from SO<sub>x</sub> emissions for 2030.

|                           | 2100  |      |       |      |       |      |
|---------------------------|-------|------|-------|------|-------|------|
|                           | RCP26 |      | RCP45 |      | RCP85 |      |
|                           | mean  | sdev | mean  | sdev | mean  | sdev |
| dry deposition            |       |      |       |      |       |      |
| North America             | 0.4   | 0.3  | 0.5   | 0.2  | 0.5   | 0.3  |
| Central + South America   | 0.4   | 0.2  | 0.5   | 0.3  | 0.6   | 0.2  |
| Africa                    | 1.5   | 0.3  | 1.5   | 0.4  | 1.6   | 0.3  |
| Europe                    | 0.3   | 0.1  | 0.4   | 0.2  | 0.3   | 0.1  |
| Former USSR + Middle East | 0.5   | 0.2  | 0.7   | 0.2  | 1.2   | 0.2  |
| Asia                      | 1.0   | 0.3  | 1.4   | 0.5  | 1.8   | 0.4  |
| Oceania                   | 0.2   | 0.1  | 0.4   | 0.1  | 0.2   | 0.1  |
| Continents                | 4.3   | 1.3  | 5.3   | 1.9  | 6.4   | 1.6  |
| Ocean                     | 7.9   | 4.4  | 10.3  | 6.4  | 9.1   | 5.2  |
| Global                    | 12.3  | 5.5  | 15.7  | 8.3  | 15.4  | 6.5  |

|                           | mean | sdev | mean | sdev | mean | sdev |
|---------------------------|------|------|------|------|------|------|
| wet deposition            |      |      |      |      |      |      |
| North America             | 0.8  | 0.4  | 0.9  | 0.1  | 1.0  | 0.4  |
| Central + South America   | 1.1  | 0.2  | 1.5  | 0.1  | 1.3  | 0.2  |
| Africa                    | 1.6  | 0.2  | 1.6  | 0.0  | 1.8  | 0.1  |
| Europe                    | 0.4  | 0.1  | 0.6  | 0.0  | 0.5  | 0.1  |
| Former USSR + Middle East | 0.9  | 0.1  | 1.1  | 0.1  | 1.4  | 0.1  |
| Asia                      | 2.4  | 0.3  | 2.9  | 0.3  | 3.3  | 0.4  |
| Oceania                   | 0.4  | 0.1  | 0.5  | 0.1  | 0.4  | 0.1  |
| Continents                | 7.7  | 0.4  | 9.1  | 0.4  | 9.7  | 0.4  |
| Ocean                     | 16.6 | 0.6  | 18.6 | 0.7  | 18.6 | 1.0  |
| Global                    | 24.4 | 0.9  | 27.8 | 1.1  | 28.3 | 1.4  |

|                           | mean | sdev | mean | sdev | mean | sdev |
|---------------------------|------|------|------|------|------|------|
| emissions                 |      |      |      |      |      |      |
| North America             | 1.4  | 1.7  | 1.2  | 0.0  | 1.7  | 1.7  |
| Central + South America   | 1.9  | 1.1  | 3.3  | 0.4  | 2.3  | 1.1  |
| Africa                    | 2.9  | 0.3  | 2.9  | 0.0  | 3.2  | 0.3  |
| Europe                    | 0.9  | 0.6  | 1.2  | 0.3  | 1.0  | 0.6  |
| Former USSR + Middle East | 1.0  | 0.4  | 1.3  | 0.0  | 2.6  | 0.4  |
| Asia                      | 3.2  | 0.9  | 4.7  | 0.5  | 5.2  | 0.9  |
| Oceania                   | 0.5  | 0.2  | 1.1  | 0.0  | 0.6  | 0.2  |
| Continents                | 11.9 | 3.5  | 15.6 | 0.2  | 16.6 | 3.5  |
| Ocean                     | 25.3 | 5.5  | 30.1 | 5.7  | 27.0 | 5.6  |
| Global                    | 37.2 | 7.6  | 45.8 | 5.5  | 43.6 | 7.7  |
| Number of models          | 4    |      | 2    |      | 4    |      |

Table S4c. Multi-model mean and standard deviation regional deposition and emission (Tg(S)/yr) from SO<sub>x</sub> emissions for 2100.

| NOy                | historical |      |      | RCP2.6 |      | RCP4.5 |      | RCP8.5 |      |
|--------------------|------------|------|------|--------|------|--------|------|--------|------|
|                    | 1850       | 1980 | 2000 | 2030   | 2100 | 2030   | 2100 | 2030   | 2100 |
| CESM-CAM-Superfast |            |      |      |        |      |        |      |        |      |
| CICERO-OsloCTM2    |            |      |      |        |      |        |      |        |      |
| CMAM               |            |      |      |        |      |        |      |        |      |
| GEOSCCM            |            |      |      |        |      |        |      |        |      |
| GISS-E2-R          |            |      |      |        |      |        |      |        |      |
| GISS-E2-R-TOMAS    |            |      |      |        |      |        |      |        |      |
| MOCAGE             |            |      |      |        |      |        |      |        |      |
| NCAR-CAM3.5        |            |      |      |        |      |        |      |        |      |
| NCAR-CAM5.1        |            |      |      |        |      |        |      |        |      |
| STOC-HadAM3        |            |      |      |        |      |        |      |        |      |
| UM-CAM             |            |      |      |        |      |        |      |        |      |
| Total              | 10         | 10   | 10   | 6      | 6    | 4      | 4    | 7      | 7    |

| NHx                | historical |      |      | RCP2.6 |      | RCP4.5 |      | RCP8.5 |      |
|--------------------|------------|------|------|--------|------|--------|------|--------|------|
|                    | 1850       | 1980 | 2000 | 2030   | 2100 | 2030   | 2100 | 2030   | 2100 |
| CESM-CAM-Superfast |            |      |      |        |      |        |      |        |      |
| CICERO-OsloCTM2    |            |      |      |        |      |        |      |        |      |
| CMAM               |            |      |      |        |      |        |      |        |      |
| GEOSCCM            |            |      |      |        |      |        |      |        |      |
| GISS-E2-R          |            |      |      |        |      |        |      |        |      |
| GISS-E2-R-TOMAS    |            |      |      |        |      |        |      |        |      |
| MOCAGE             |            |      |      |        |      |        |      |        |      |
| NCAR-CAM3.5        |            |      |      |        |      |        |      |        |      |
| NCAR-CAM5.1        |            |      |      |        |      |        |      |        |      |
| STOC-HadAM3        |            |      |      |        |      |        |      |        |      |
| UM-CAM             |            |      |      |        |      |        |      |        |      |
| Total              | 5          | 5    | 5    | 3      | 3    | 2      | 2    | 3      | 3    |

| SOx                | historical |      |      | RCP2.6 |      | RCP4.5 |      | RCP8.5 |      |
|--------------------|------------|------|------|--------|------|--------|------|--------|------|
|                    | 1850       | 1980 | 2000 | 2030   | 2100 | 2030   | 2100 | 2030   | 2100 |
| CESM-CAM-Superfast |            |      |      |        |      |        |      |        |      |
| CICERO-OsloCTM2    |            |      |      |        |      |        |      |        |      |
| CMAM               |            |      |      |        |      |        |      |        |      |
| GEOSCCM            |            |      |      |        |      |        |      |        |      |
| GISS-E2-R          |            |      |      |        |      |        |      |        |      |
| GISS-E2-R-TOMAS    |            |      |      |        |      |        |      |        |      |
| MOCAGE             |            |      |      |        |      |        |      |        |      |
| NCAR-CAM3.5        |            |      |      |        |      |        |      |        |      |
| NCAR-CAM5.1        |            |      |      |        |      |        |      |        |      |
| STOC-HadAM3        |            |      |      |        |      |        |      |        |      |
| UM-CAM             |            |      |      |        |      |        |      |        |      |
| Total              | 7          | 6    | 7    | 4      | 4    | 2      | 2    | 4      | 4    |

Table S5. Compendium of models providing fields for deposition analysis. A filled rectangle indicates a time slice to which the specific model contributed.

| Ice Core Site Name  | Latitude  | Longitude  | Elevation (m) |
|---------------------|-----------|------------|---------------|
| Antarctica          |           |            |               |
| W10                 | 66° 44' S | 112° 50' E | 1390          |
| THW                 | 76° 57' S | 121° 13' W | 2020          |
| DIV                 | 76° 46' S | 101° 44' W | 1329          |
| WD                  | 79° 28' S | 112° 41' W | 1759          |
| PIG                 | 77° 57' S | 95° 57' W  | 1593          |
| NUS Site8_7         | 74° 53' S | 01° 36' E  | 2700          |
| NUS Site8_4         | 82° 49' S | 18° 54' E  | 2552          |
| NUS Site8_5         | 82° 38' S | 17° 52' E  | 2554          |
| NUS Site7_7         | 82° 04' S | 54° 53' E  | 3725          |
| NUS Site7_5         | 78° 39' S | 35° 38' E  | 3619          |
| NUS Site7_2         | 76° 04' S | 22° 28' E  | 3582          |
| NUS Site7_1         | 73° 43' S | 7° 59' E   | 3174          |
| Northern hemisphere |           |            |               |
| ACT11d              | 66° 28' N | 46° 18' W  | 2296          |
| D4                  | 71° 24' N | 43° 54' W  | 2766          |
| Zoe                 | 72° 36' N | 38° 18' W  | 3258          |
| NEEMS3              | 77° 26' N | 51° 03' W  | 2454          |
| Tunu                | 78° 01' N | 33° 59' W  | 2213          |
| McCall              | 69° 18' N | 143° 48' W | 2400          |
| Akademii Nauk       | 80° 31' N | 94° 49' E  | 750           |
| Flade Isblink       | 81° 35' N | 15° 42' W  | 618           |

Table S6. Geographical information on the various ice-cores used in this study.

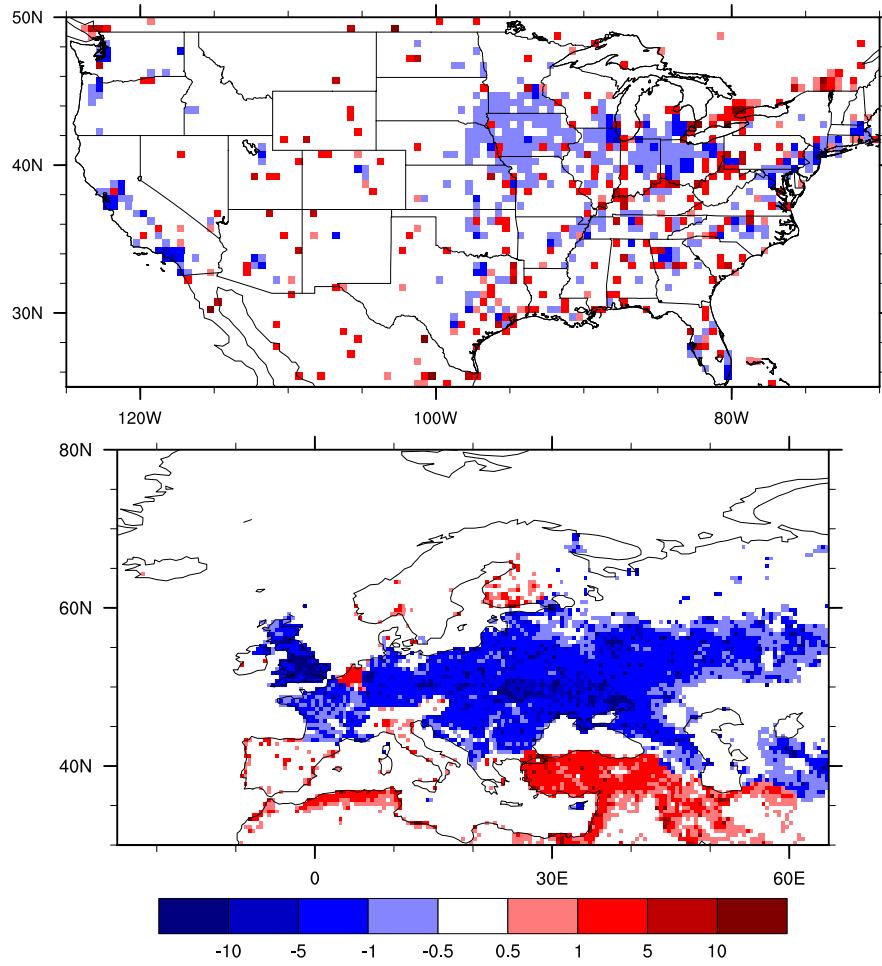

**Figure S1a.** Change in NO anthropogenic emissions (2000-1980) in  $10^{-2} \text{ mg(N)/m}^2/\text{year}$ .



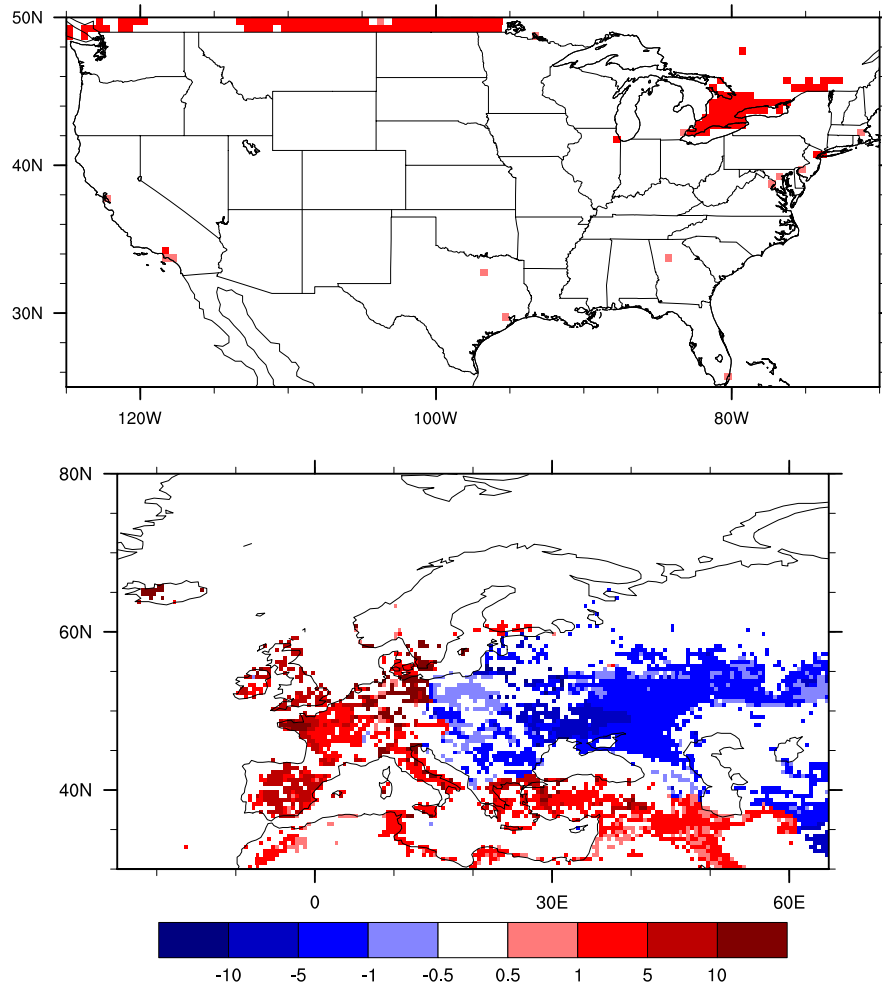

**Figure S1b.** Change in  $\text{NH}_3$  anthropogenic emissions (2000-1980) in  $10^{-2} \text{ mg(N)/m}^2/\text{year}$ .

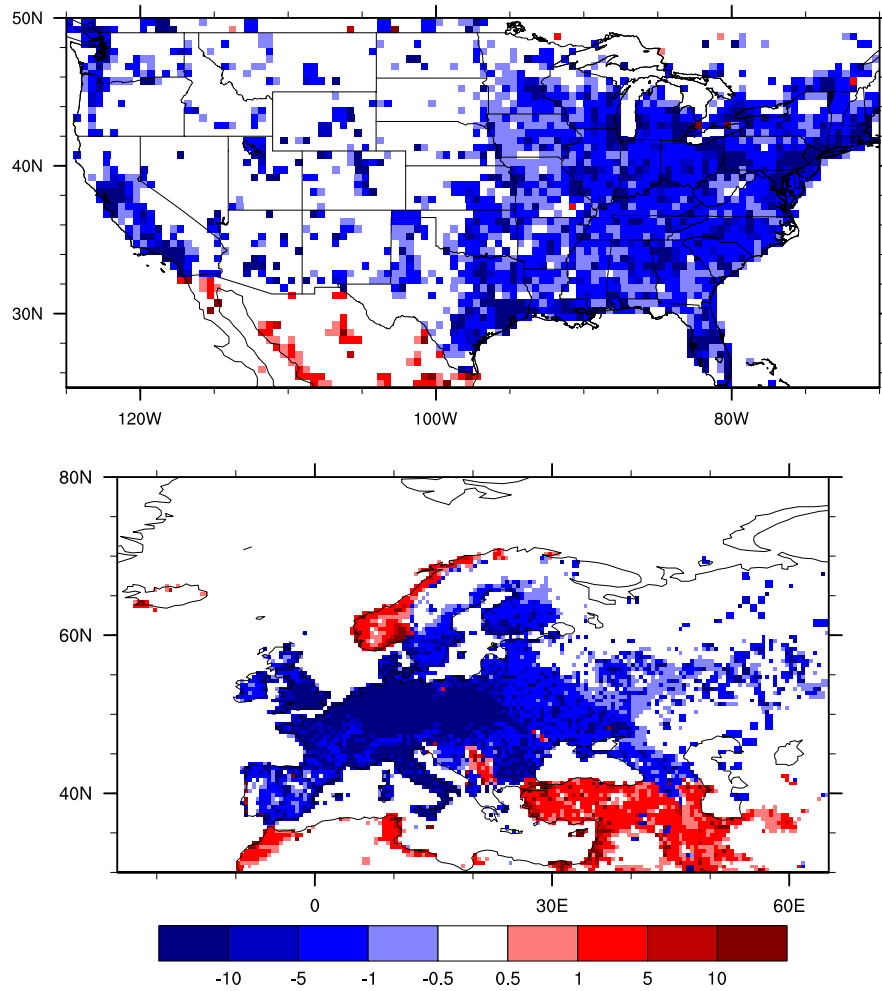

**Figure S1c.** Change in SO<sub>2</sub> anthropogenic emissions (2000-1980) in 10<sup>-2</sup> mg(S)/m<sup>2</sup>/year.

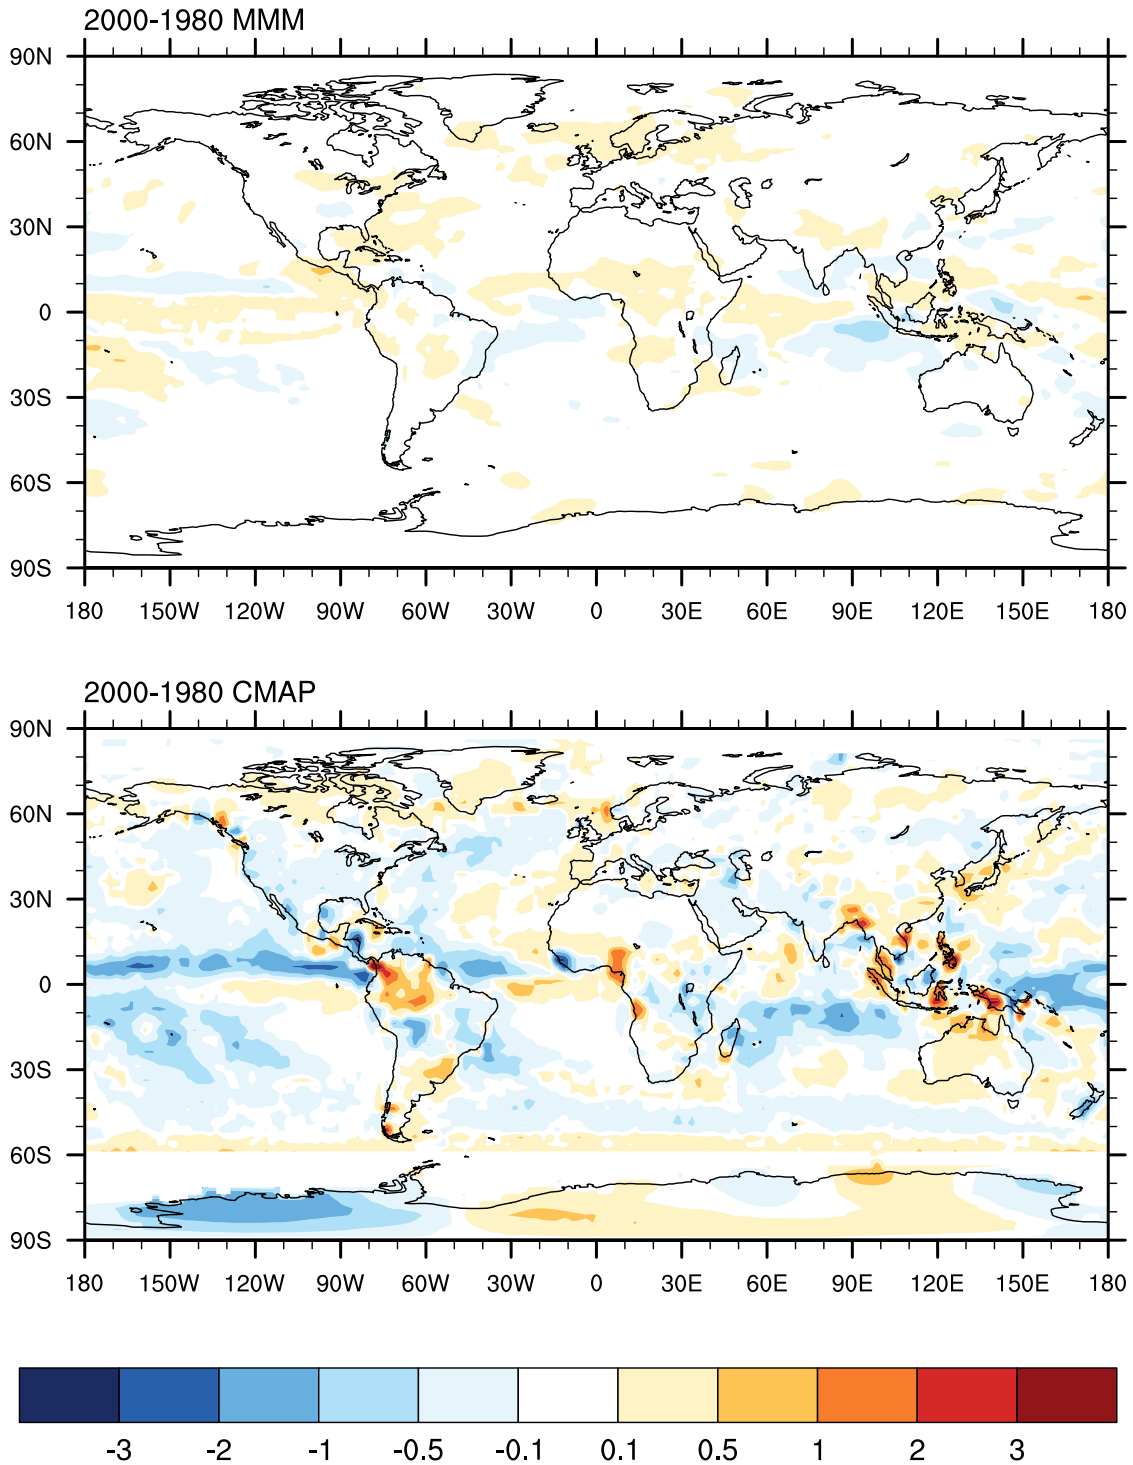

**Figure S2.** Comparison of annual mean precipitation (mm/day) change (2000-1980) from the ACCMIP MMM (top) and from the CMAP database (bottom; Xie and Arkin, 1997). Note that a 6-year average on the CMAP data is used for both time slices.

### Annual precipitation (mm/year)

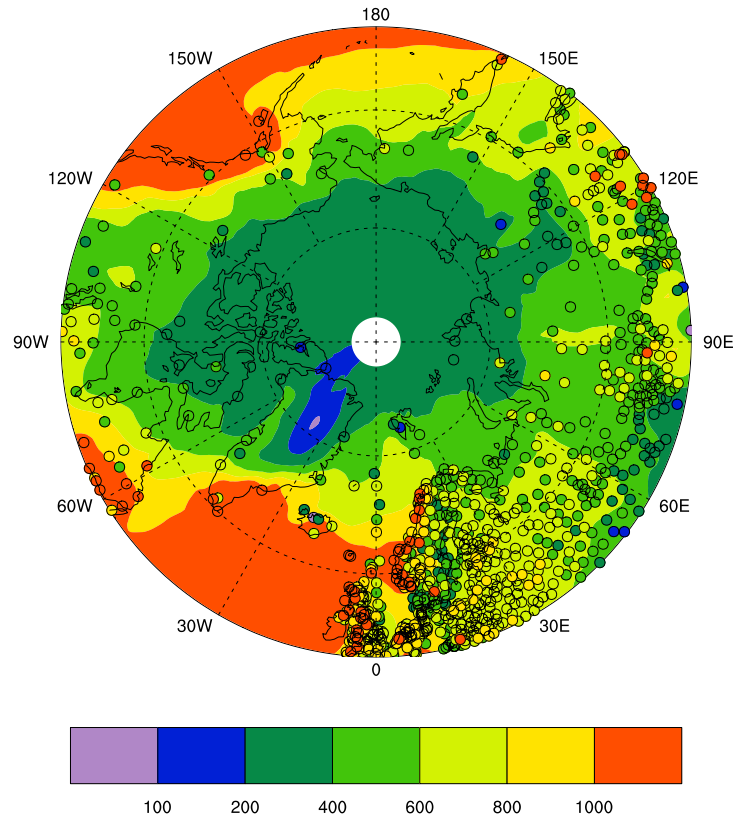

**Figure S3.** Annual mean precipitation from the ACCMIP 2000 MMM (contours) and observations (filled circles) from Yang et al. (2005).

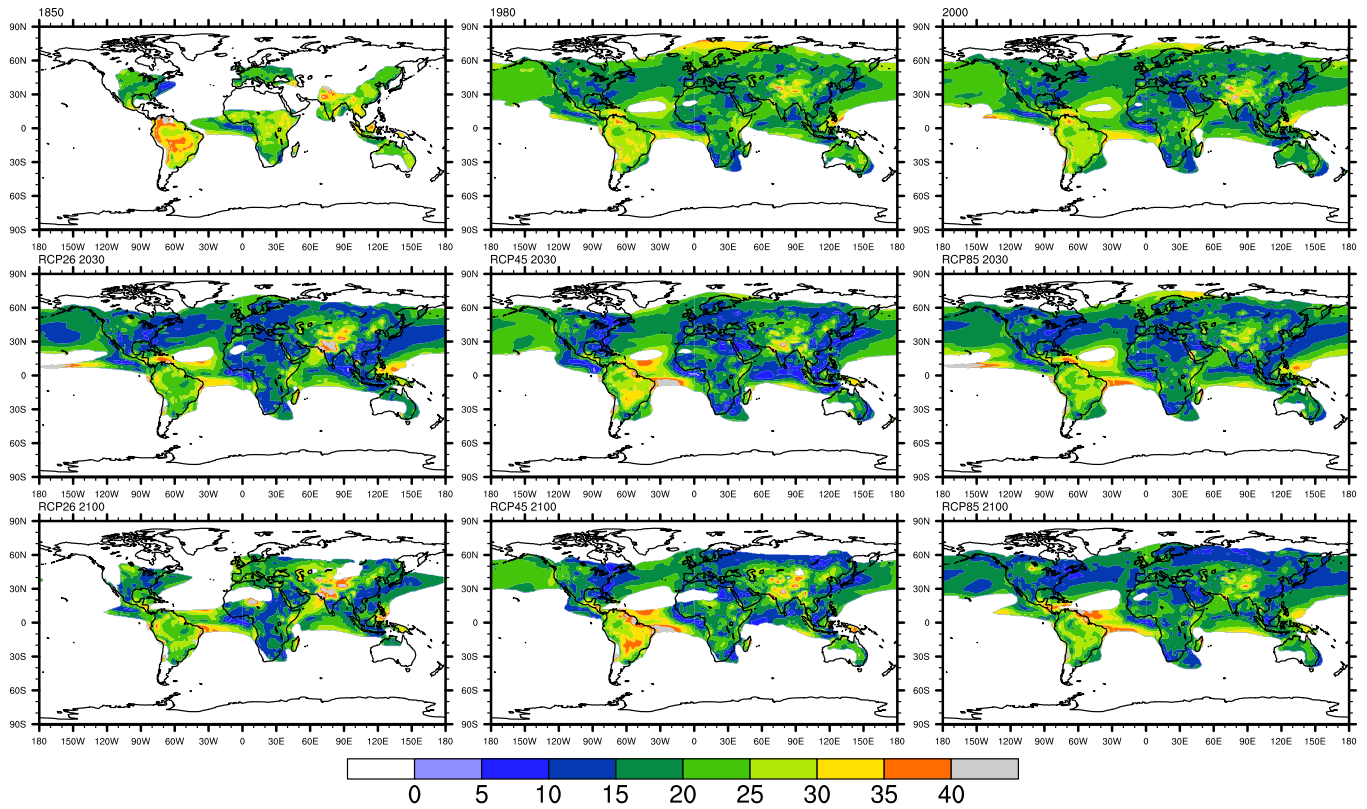

**Figure S4.** Inter-model standard deviation (in %) of the NO<sub>y</sub> wet deposition. The standard deviation is only shown for regions where deposition is larger than 50 mg(N)/m<sup>2</sup>/year (see Fig. 5a). The number of models used for each time slice is shown in Table S2.

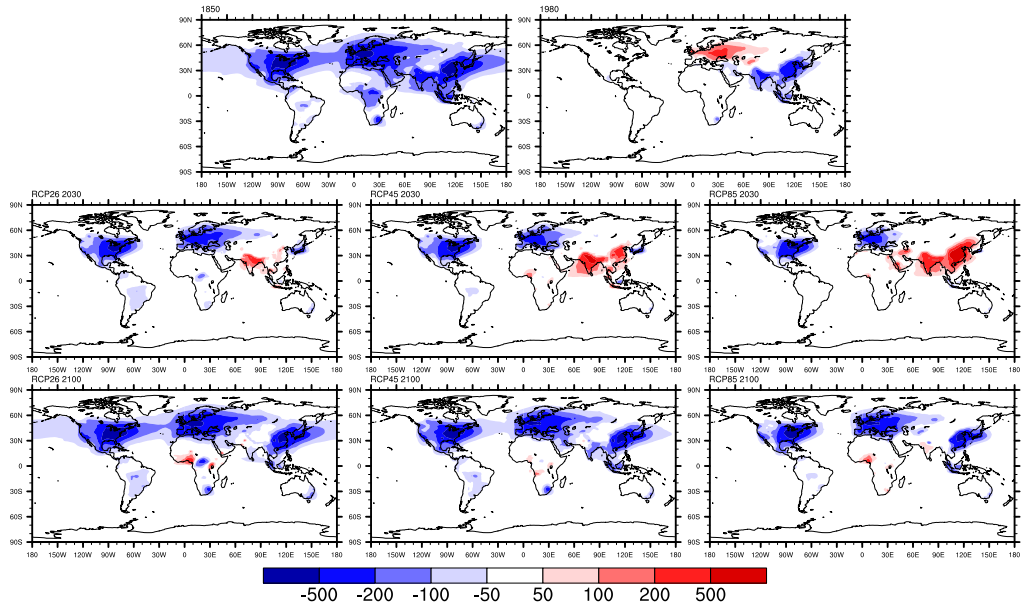

**Figure S5a.** Total (wet + dry) MMM NO<sub>y</sub> deposition 1850–2100 (mg(N)m<sup>-2</sup>yr<sup>-1</sup>) relative to year 2000. Top row shows 1850 and 1980. Middle row shows 2030 for RCP2.6, RCP4.5 and RCP8.5. Bottom row shows 2100 for RCP2.6, RCP4.5 and RCP8.5.

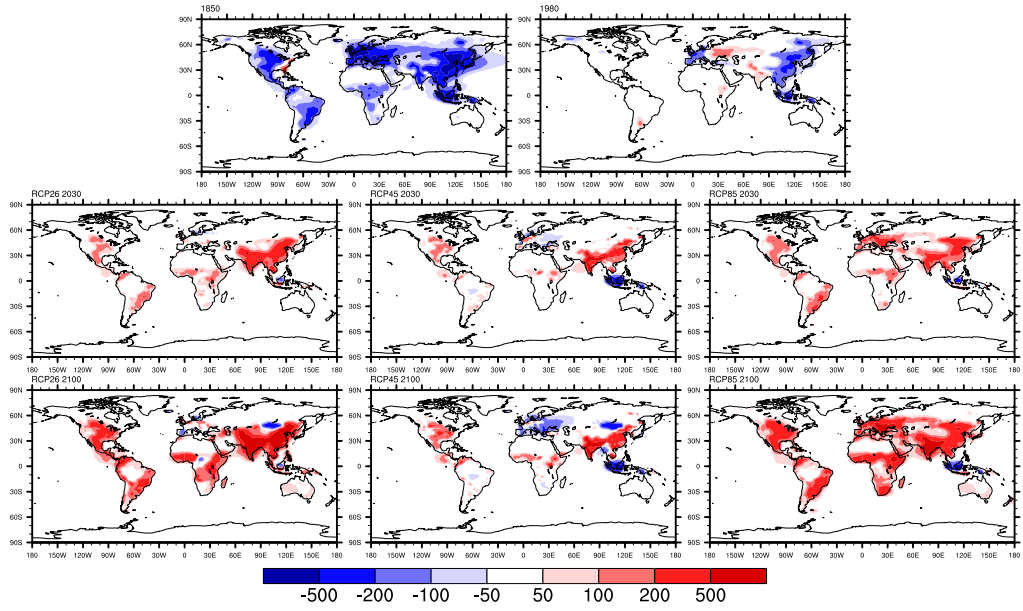

**Figure S5b.** Total (wet + dry) MMM  $\text{NX}_x$  deposition 1850-2100 ( $\text{mg(N)m}^{-2}\text{yr}^{-1}$ ) relative to year 2000. Top row shows 1850 and 1980. Middle row shows 2030 for RCP2.6, RCP4.5 and RCP8.5. Bottom row shows 2100 for RCP2.6, RCP4.5 and RCP8.5.

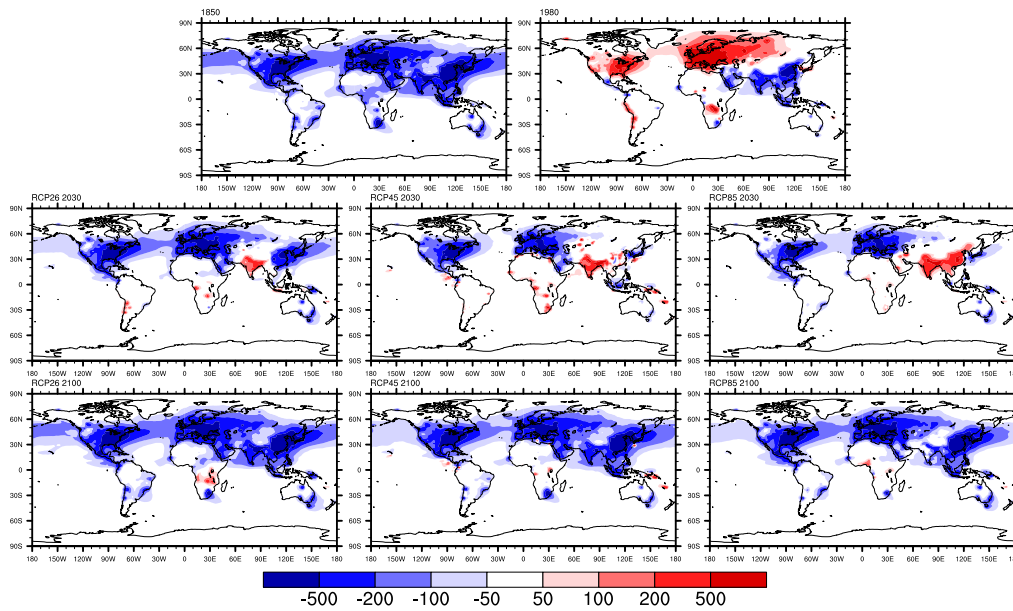

**Figure S5c.** Total (wet + dry) MMM SO<sub>x</sub> deposition 1850-2100 (mg(S)m<sup>-2</sup>yr<sup>-1</sup>) relative to year 2000. Top row shows 1850 and 1980. Middle row shows 2030 for RCP2.6, RCP4.5 and RCP8.5. Bottom row shows 2100 for RCP2.6, RCP4.5 and RCP8.5.
